# Supplementary material for: Low temperature surfactant-free synthesis of monodisperse β-NaGdF4nanorods by a novel ion-exchange process and their luminescence properties
Source: Royal Society of Chemistry journal article supplement (doi:10.1039/c7ce00097a), 2017-01-01
Supplement: c7ce00097a1.pdf [file c7ce00097a1.pdf]

## Supplementary Information:

# Low Temperature Surfactant-free Synthesis of Monodispersed $\beta$ -NaGdF<sub>4</sub> Nanorods by Novel Ion-exchange Process and Their Luminescent Properties

Lingfei Zhao,<sup>#,a</sup> Ying Tao<sup>#,a</sup> and Hongpeng You<sup>\*,a</sup>

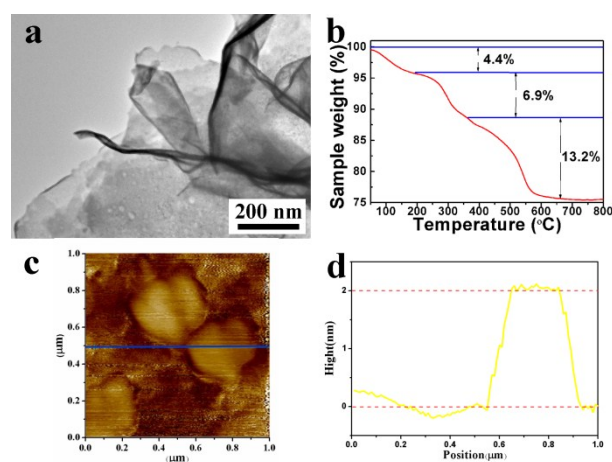

**Fig. S1** SEM image (a), TGA trace (b), AFM image (c), AFM height profile (d) of the as-prepared precursor.

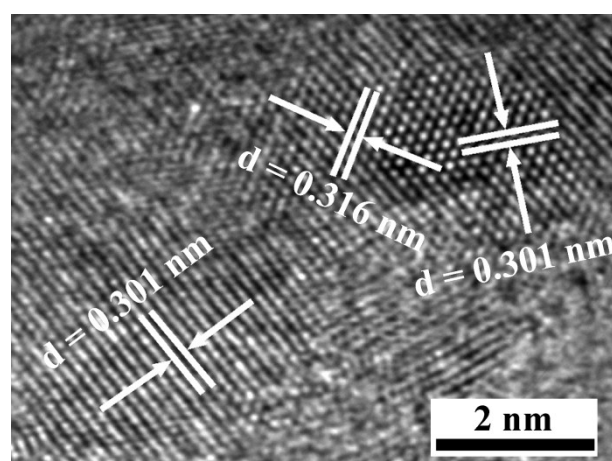

**Fig. S2** HRTEM image of the nanosheets formed after dropping in NaF solution for 10 minutes.

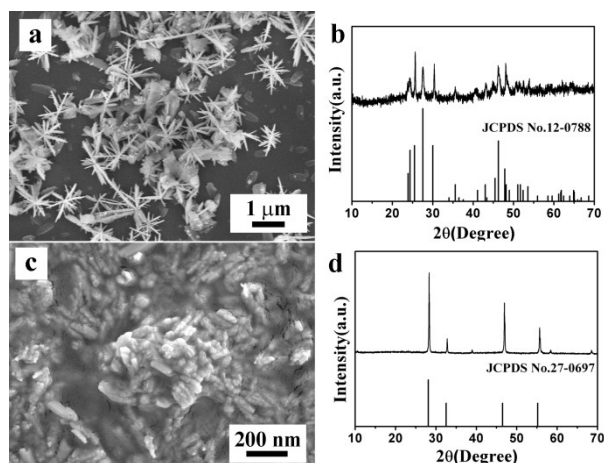

**Fig. S3** SEM image (a), XRD patterns (b) of as-prepared  $\text{GdF}_3$ ; SEM image (c), XRD patterns (d) of as-prepared cubic  $\text{NaGdF}_4$ .

As shown in Fig. S3, without the introducing of ammonium hydroxide solution and the structural directing of the Gadolinium hydroxynitrate precursor, the product resulted from hydrothermal reaction of aqueous solution containing  $\text{Gd}(\text{NO}_3)_3$  and  $\text{NaF}$  depends on the fluoride to Gadolinium molar ratio. A ratio of 4/1 leads to the formation of  $\text{GdF}_3$  (Fig. S3a, b) and a ratio of 12/1 results in the formation of cubic  $\text{NaGdF}_4$  (Fig. S3c, d). When other parameters were the same, different fluoride to Gadolinium ratios would produce  $\text{GdF}_3$  or cubic  $\text{NaGdF}_4$  or a mixture of these, but no pure hexagonal  $\text{NaGdF}_4$  had been detected.

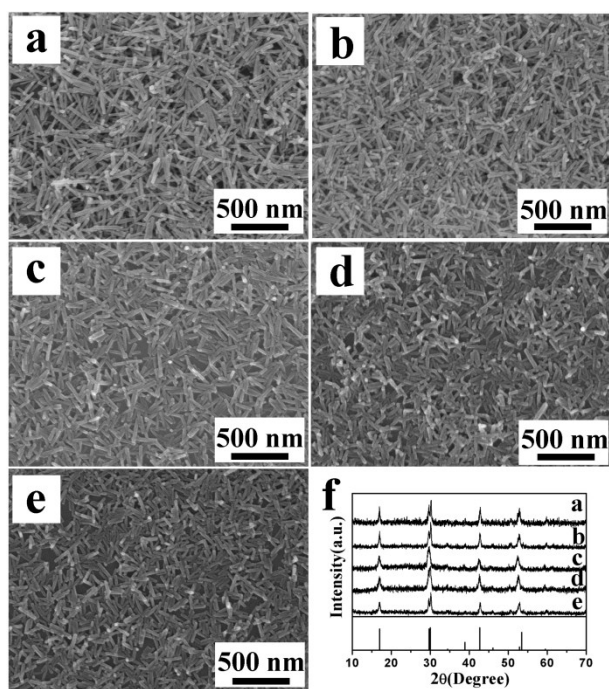

**Fig. S4** SEM images of doped  $\text{NaGdF}_4$  nanoparticles:  $\text{NaGdF}_4:\text{Eu}^{3+}$  (a),  $\text{NaGdF}_4:\text{Tb}^{3+}$  (b),  $\text{NaGdF}_4:\text{Yb}^{3+},\text{Er}^{3+}$  (c),  $\text{NaGdF}_4:\text{Yb}^{3+},\text{Tm}^{3+}$  (d),  $\text{NaGdF}_4:\text{Yb}^{3+},\text{Ho}^{3+}$  (e); corresponding XRD patterns of a, b, c, d, and e (f).

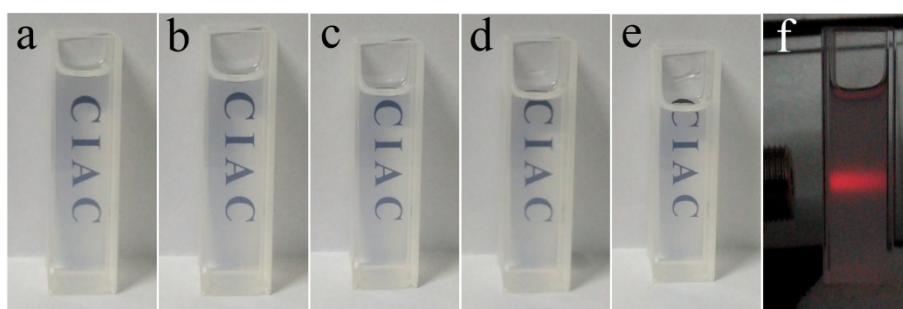

**Fig. S5** Digital photographs of one typically fabricated  $\beta$ - $\text{NaGdF}_4$  nanocrystal being dispersed in water (2 mg/mL) for different times: a, 8 hours; b, 16 hours; c, 1 day; d, 2 days and e 3 days. UC luminescence digital photograph of one typically synthesized  $\text{NaGdF}_4:\text{Yb},\text{Er}$  nanocrystal being dispersed in water, all the other parameters are the same as the one in ethanol.
